# Supplementary figures and images for: Electrostatically responsive liquid gating system for controlled microbubble generation
Source: Royal Society of Chemistry journal article supplement (doi:10.1039/d4im00037d), 2024-01-01

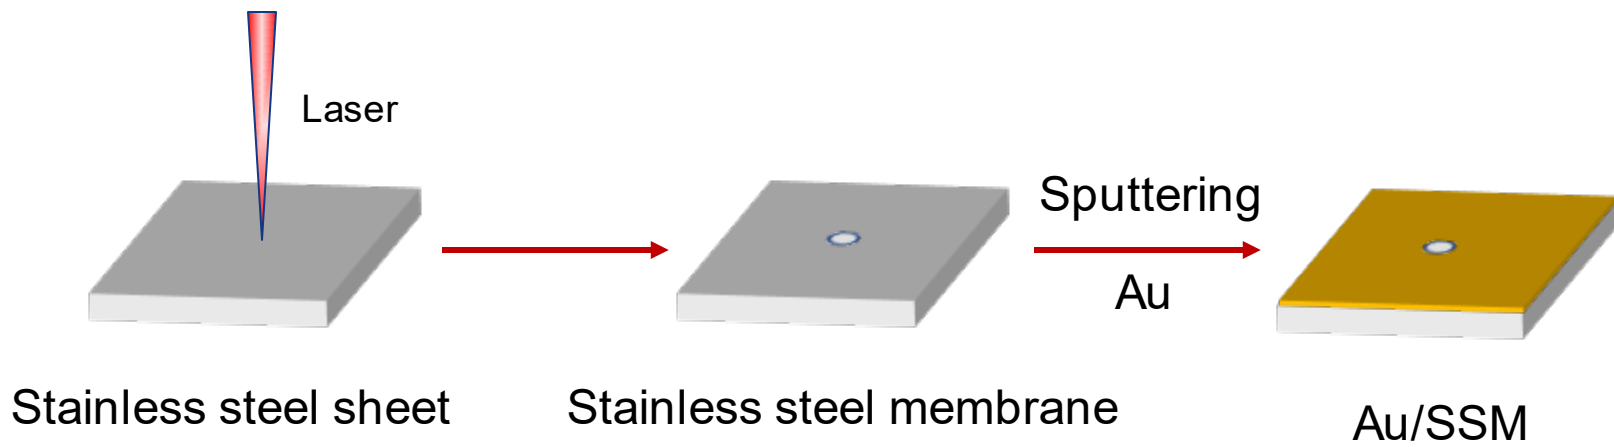

Supplement: d4im00037d1.pdf [file d4im00037d1.pdf]

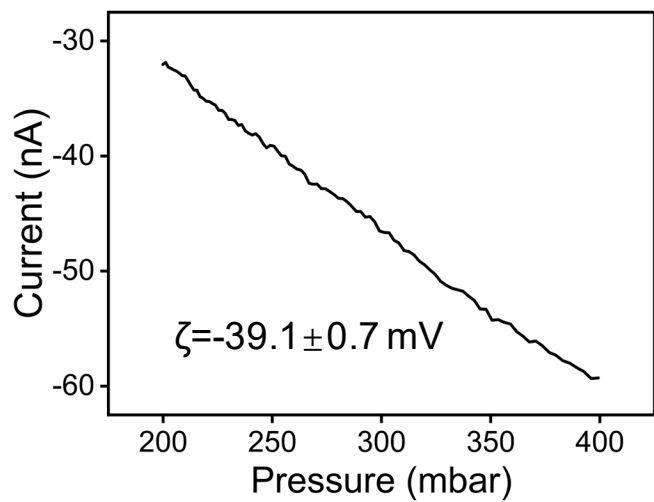

Supplement: d4im00037d2.pdf [file d4im00037d2.pdf]

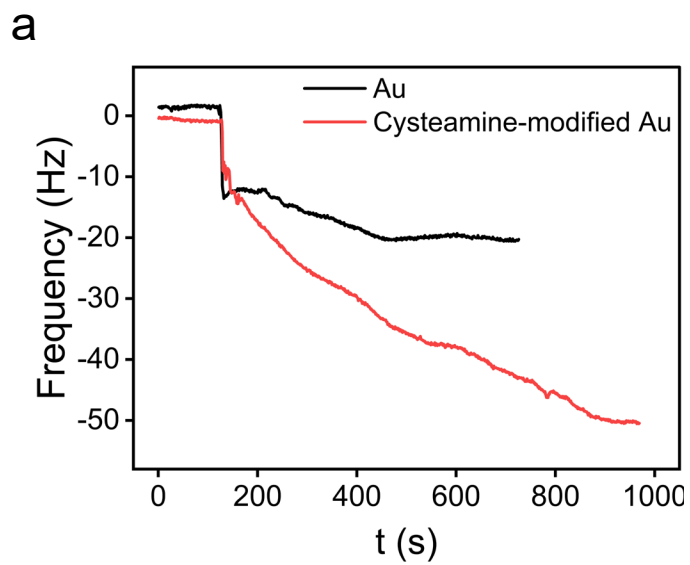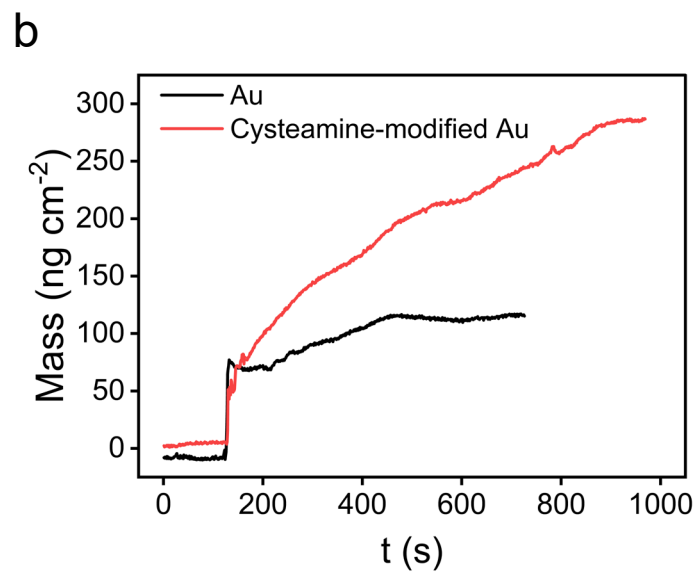

Supplement: d4im00037d3.pdf [file d4im00037d3.pdf]

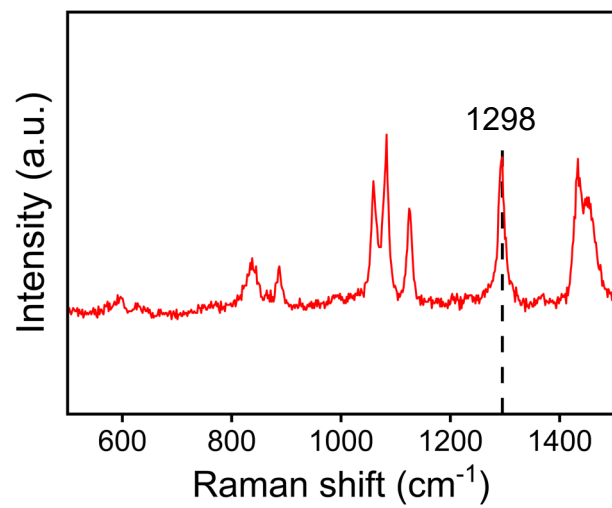

Supplement: d4im00037d4.pdf [file d4im00037d4.pdf]

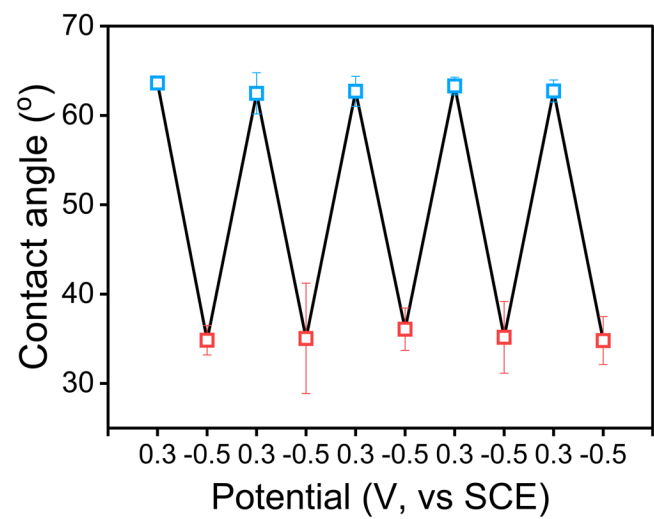

Supplement: d4im00037d5.pdf [file d4im00037d5.pdf]

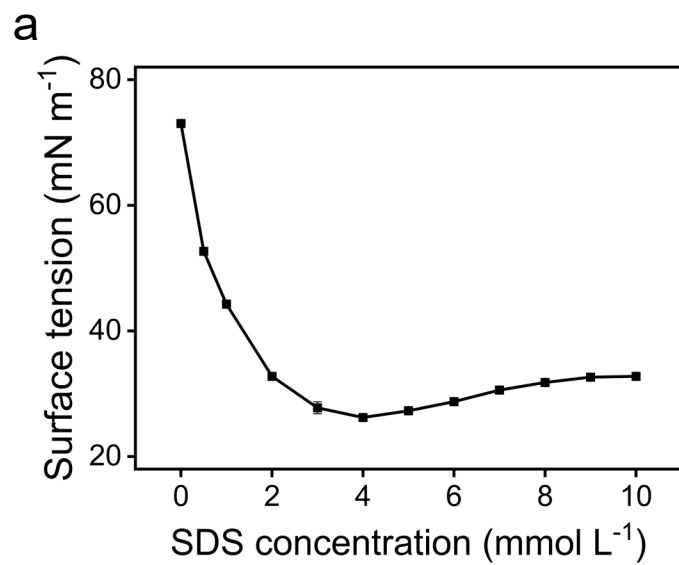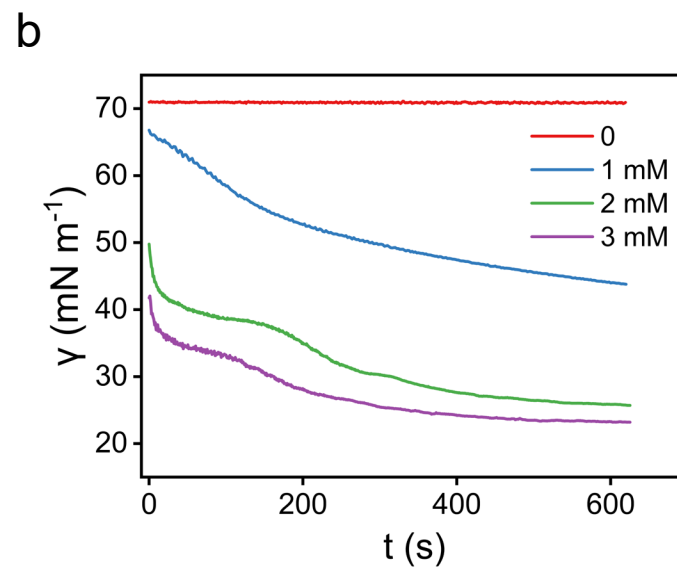

Supplement: d4im00037d6.pdf [file d4im00037d6.pdf]
